# Supplementary material for: New-Onset Rheumatic Immune-Mediated Inflammatory Diseases Following SARS-CoV-2 Vaccinations until May 2023: A Systematic Review
Source: MDPI journal article supplement (doi:10.3390/vaccines11101571), 2023-10-08
Supplement: s1 [file s1]

*Systematic review: new rheumatic immune-mediated inflammatory diseases (R-IMiDs) after SARS CoV-2 vaccinations*

30 May 20

**Search strategies**

**A.1 Medline**

Ovid MEDLINE(R) ALL <1946 to May 24, 2023> Results per line

Date: 25/05/2023

|    |                                                                 |        |
|----|-----------------------------------------------------------------|--------|
| 1  | exp Arthritis, Rheumatoid/                                      | 125199 |
| 2  | exp Axial Spondyloarthritis/                                    | 16644  |
| 3  | Spondylitis, Ankylosing/                                        | 16422  |
| 4  | Arthritis, Reactive/                                            | 4060   |
| 5  | Arthritis, Psoriatic/                                           | 8022   |
| 6  | exp Crystal Arthropathies/                                      | 15744  |
| 7  | exp Gout/                                                       | 13865  |
| 8  | exp Chondrocalcinosis/                                          | 2235   |
| 9  | exp Connective Tissue Diseases/                                 | 346656 |
| 10 | Antiphospholipid Syndrome/                                      | 9262   |
| 11 | exp Lupus Erythematosus, Systemic/                              | 66856  |
| 12 | Sjogren's Syndrome/                                             | 14563  |
| 13 | exp Scleroderma, Systemic/                                      | 23012  |
| 14 | exp Myositis/                                                   | 22425  |
| 15 | Dermatomyositis/                                                | 9030   |
| 16 | Polymyositis/                                                   | 2723   |
| 17 | Still's Disease, Adult-Onset/                                   | 1683   |
| 18 | exp Anti-Neutrophil Cytoplasmic Antibody-Associated Vasculitis/ | 12278  |
| 19 | Granulomatosis with Polyangiitis/                               | 7812   |
| 20 | exp Microscopic Polyangiitis/                                   | 733    |
| 21 | Polyarteritis Nodosa/                                           | 6230   |
| 22 | Takayasu Arteritis/                                             | 4594   |
| 23 | Giant Cell Arteritis/                                           | 7470   |

|    |                                                                                                                                                                                                                                                                                                                                                                                                                                                                                                                                                                                                                                                                                                                                                                                                                                                                                                                                                                                                                                                                                                                                                                                                                                                                                                                                                                                                             |          |
|----|-------------------------------------------------------------------------------------------------------------------------------------------------------------------------------------------------------------------------------------------------------------------------------------------------------------------------------------------------------------------------------------------------------------------------------------------------------------------------------------------------------------------------------------------------------------------------------------------------------------------------------------------------------------------------------------------------------------------------------------------------------------------------------------------------------------------------------------------------------------------------------------------------------------------------------------------------------------------------------------------------------------------------------------------------------------------------------------------------------------------------------------------------------------------------------------------------------------------------------------------------------------------------------------------------------------------------------------------------------------------------------------------------------------|----------|
| 24 | Polymyalgia Rheumatica/                                                                                                                                                                                                                                                                                                                                                                                                                                                                                                                                                                                                                                                                                                                                                                                                                                                                                                                                                                                                                                                                                                                                                                                                                                                                                                                                                                                     | 2792     |
| 25 | Polychondritis, Relapsing/                                                                                                                                                                                                                                                                                                                                                                                                                                                                                                                                                                                                                                                                                                                                                                                                                                                                                                                                                                                                                                                                                                                                                                                                                                                                                                                                                                                  | 1526     |
| 26 | exp Sarcoidosis/                                                                                                                                                                                                                                                                                                                                                                                                                                                                                                                                                                                                                                                                                                                                                                                                                                                                                                                                                                                                                                                                                                                                                                                                                                                                                                                                                                                            | 26956    |
| 27 | Behcet Syndrome/                                                                                                                                                                                                                                                                                                                                                                                                                                                                                                                                                                                                                                                                                                                                                                                                                                                                                                                                                                                                                                                                                                                                                                                                                                                                                                                                                                                            | 10054    |
| 28 | IgA Vasculitis/                                                                                                                                                                                                                                                                                                                                                                                                                                                                                                                                                                                                                                                                                                                                                                                                                                                                                                                                                                                                                                                                                                                                                                                                                                                                                                                                                                                             | 4935     |
| 29 | Cryoglobulinemia/                                                                                                                                                                                                                                                                                                                                                                                                                                                                                                                                                                                                                                                                                                                                                                                                                                                                                                                                                                                                                                                                                                                                                                                                                                                                                                                                                                                           | 3330     |
| 30 | Cogan Syndrome/                                                                                                                                                                                                                                                                                                                                                                                                                                                                                                                                                                                                                                                                                                                                                                                                                                                                                                                                                                                                                                                                                                                                                                                                                                                                                                                                                                                             | 258      |
| 31 | Immunoglobulin G4-Related Disease/                                                                                                                                                                                                                                                                                                                                                                                                                                                                                                                                                                                                                                                                                                                                                                                                                                                                                                                                                                                                                                                                                                                                                                                                                                                                                                                                                                          | 1190     |
| 32 | (rheumatic immune mediated inflammatory diseases or R-IMID\$ or Inflammatory arthritis or rheumatoid arthritis or Axial Spondyloarthritis or ankylosing spondylitis or reactive arthritis or psoriatic arthritis or crystal arthritis or gout or pseudogout or chondrocalcinosis or "remitting seronegative symmetrical synovitis with pitting oedema" or "remitting seronegative symmetrical synovitis with pitting edema" or connective tissue disease\$ or CTD or anti-phospholipid syndrome or (systemic lupus erythematosus or SLE) or lupus or (systemic sclerosis or scleroderma) or inflammatory myopathy or myositis or dermatomyositis or polymyositis or necrotizing autoimmune myopathy or anti-synthetase syndrome or adult-onset stills disease or Anti-Neutrophil Cytoplasmic Antibody-Associated Vasculitis or ANCA associated vasculitis or "Granulomatosis with polyangiitis" or "Eosinophilic granulomatosis with polyangiitis" or microscopic polyangiitis or Polyarteritis Nodosa or large vessel vasculitis or Takayasu\$ arteritis or Giant Cell Arteritis or medium vessel vasculitis or small vessel vasculitis or polymyalgia rheumatica or relapsing polychondritis or sarcoidosis or bechet\$ disease or behcet\$ syndrome or IgA Vasculitis or Henoch-Schoenlein purpura or Cryoglobulinemia\$ or cogan\$ syndrome or Immunoglobulin G4-Related Disease or "IgG4 disease").mp. |          |
| 33 | or/1-32                                                                                                                                                                                                                                                                                                                                                                                                                                                                                                                                                                                                                                                                                                                                                                                                                                                                                                                                                                                                                                                                                                                                                                                                                                                                                                                                                                                                     | 571738   |
| 34 | exp COVID-19 Vaccines/                                                                                                                                                                                                                                                                                                                                                                                                                                                                                                                                                                                                                                                                                                                                                                                                                                                                                                                                                                                                                                                                                                                                                                                                                                                                                                                                                                                      | 21269    |
| 35 | (chadox1 ncov-19 or ad26covs1 or 2019-ncov vaccine mrna-1273 or bnt162 vaccine).mp.                                                                                                                                                                                                                                                                                                                                                                                                                                                                                                                                                                                                                                                                                                                                                                                                                                                                                                                                                                                                                                                                                                                                                                                                                                                                                                                         |          |
|    |                                                                                                                                                                                                                                                                                                                                                                                                                                                                                                                                                                                                                                                                                                                                                                                                                                                                                                                                                                                                                                                                                                                                                                                                                                                                                                                                                                                                             | 4809     |
| 36 | (SARS CoV-2 vaccin\$ or Pfizer-Bio-N-tech or Pfizer or Moderna or AstraZeneca or Covishield or Covaxin or Sputnik V or Sinovac or Sinopharm or Corona Vac or Corona virus disease-19 vaccine).mp.                                                                                                                                                                                                                                                                                                                                                                                                                                                                                                                                                                                                                                                                                                                                                                                                                                                                                                                                                                                                                                                                                                                                                                                                           |          |
|    |                                                                                                                                                                                                                                                                                                                                                                                                                                                                                                                                                                                                                                                                                                                                                                                                                                                                                                                                                                                                                                                                                                                                                                                                                                                                                                                                                                                                             | 14729    |
| 37 | ((coronavirus\$ or 2019nCoV\$ or 19nCoV\$ or "2019 novel\$" or Ncov\$ or "n-cov" or "SARS-CoV-2\$" or "SARSCoV-2\$" or SARSCoV2\$ or "SARS-CoV2\$" or "severe acute respiratory syndrome\$" or COVID\$2) adj3 vaccin\$).mp.                                                                                                                                                                                                                                                                                                                                                                                                                                                                                                                                                                                                                                                                                                                                                                                                                                                                                                                                                                                                                                                                                                                                                                                 |          |
|    |                                                                                                                                                                                                                                                                                                                                                                                                                                                                                                                                                                                                                                                                                                                                                                                                                                                                                                                                                                                                                                                                                                                                                                                                                                                                                                                                                                                                             | 36392    |
| 38 | or/34-37                                                                                                                                                                                                                                                                                                                                                                                                                                                                                                                                                                                                                                                                                                                                                                                                                                                                                                                                                                                                                                                                                                                                                                                                                                                                                                                                                                                                    | 42535    |
| 39 | 33 and 38                                                                                                                                                                                                                                                                                                                                                                                                                                                                                                                                                                                                                                                                                                                                                                                                                                                                                                                                                                                                                                                                                                                                                                                                                                                                                                                                                                                                   | 1101     |
| 40 | (new-onset or new presentation or newly presenting or newly presented or new diagnosis or newly diagnosed or newly developed or "linked with" or "linked to" or associated or post or following or after or "connected to" or "connected with").mp.                                                                                                                                                                                                                                                                                                                                                                                                                                                                                                                                                                                                                                                                                                                                                                                                                                                                                                                                                                                                                                                                                                                                                         |          |
|    |                                                                                                                                                                                                                                                                                                                                                                                                                                                                                                                                                                                                                                                                                                                                                                                                                                                                                                                                                                                                                                                                                                                                                                                                                                                                                                                                                                                                             | 11300844 |
| 41 | 39 and 40                                                                                                                                                                                                                                                                                                                                                                                                                                                                                                                                                                                                                                                                                                                                                                                                                                                                                                                                                                                                                                                                                                                                                                                                                                                                                                                                                                                                   | 870      |

|    |              |          |
|----|--------------|----------|
| 42 | exp Animals/ | 26382900 |
| 43 | Humans/      | 21259566 |
| 44 | 42 not 43    | 5123334  |
| 45 | 41 not 44    | 869      |

## A.2 Embase

Embase <1974 to 2023 May 24> Results per line

Date: 25/05/2023

|    |                                   |        |
|----|-----------------------------------|--------|
| 1  | exp rheumatoid arthritis/         | 237322 |
| 2  | exp axial spondyloarthritis/      | 32894  |
| 3  | ankylosing spondylitis/           | 31670  |
| 4  | reactive arthritis/               | 4034   |
| 5  | psoriatic arthritis/              | 30756  |
| 6  | exp crystal arthropathy/          | 26613  |
| 7  | gout/                             | 25732  |
| 8  | pseudogout/                       | 1267   |
| 9  | exp connective tissue disease/    | 531232 |
| 10 | exp antiphospholipid syndrome/    | 20529  |
| 11 | exp systemic lupus erythematosus/ | 110160 |
| 12 | lupus vulgaris/                   | 3387   |
| 13 | Sjogren syndrome/                 | 27760  |
| 14 | exp systemic sclerosis/           | 36983  |
| 15 | exp scleroderma/                  | 54045  |
| 16 | exp myositis/                     | 47381  |
| 17 | exp dermatomyositis/              | 19335  |
| 18 | polymyositis/                     | 9699   |
| 19 | adult onset Still disease/        | 2985   |
| 20 | exp ANCA associated vasculitis/   | 27412  |
| 21 | Wegener granulomatosis/           | 15078  |
| 22 | microscopic polyangiitis/         | 4132   |
| 23 | polyarteritis nodosa/             | 7175   |
| 24 | aortic arch syndrome/             | 3515   |
| 25 | exp giant cell arteritis/         | 13587  |
| 26 | rheumatic polymyalgia/            | 6715   |
| 27 | relapsing polychondritis/         | 2385   |

- 28 exp sarcoidosis/46457
- 29 Behcet disease/17454
- 30 anaphylactoid purpura/ 7486
- 31 cryoglobulinemia/ 7289
- 32 Cogan syndrome/ 843
- 33 immunoglobulin G4 related disease/ 5099
- 34 (rheumatic immune mediated inflammatory diseases or R-IMID\$ or Inflammatory arthritis or rheumatoid arthritis or Axial Spondyloarthritis or ankylosing spondylitis or reactive arthritis or psoriatic arthritis or crystal arthritis or gout or pseudogout or chondrocalcinosis or "remitting seronegative symmetrical synovitis with pitting oedema" or "remitting seronegative symmetrical synovitis with pitting edema" or connective tissue disease\$ or CTD or anti-phospholipid syndrome or (systemic lupus erythematosus or SLE) or lupus or (systemic sclerosis or scleroderma) or inflammatory myopathy or myositis or dermatomyositis or polymyositis or necrotizing autoimmune myopathy or anti-synthetase syndrome or adult-onset stills disease or Anti-Neutrophil Cytoplasmic Antibody-Associated Vasculitis or ANCA associated vasculitis or "Granulomatosis with polyangiitis" or wegener Granulomatosis or "Eosinophilic granulomatosis with polyangiitis" or microscopic polyangiitis or Polyarteritis Nodosa or large vessel vasculitis or Takayasu\$ arteritis or aortic arch syndrome or Giant Cell Arteritis or medium vessel vasculitis or small vessel vasculitis or polymyalgia rheumatica or relapsing polychondritis or sarcoidosis or bechet\$ disease or behcet\$ syndrome or IgA Vasculitis or anaphylactoid purpura or Henoch-Schoenlein purpura or Cryoglobulinemia\$ or cogan\$ syndrome or immunoglobulin G4 related disease or "IgG4 disease").mp. 691340
- 35 or/1-34 786726
- 36 exp SARS-CoV-2 vaccine/ 36598
- 37 (chadox1 ncov-19 or ad26covs1 or 2019-ncov vaccine mrna-1273 or bnt162 vaccine).mp. 1814
- 38 (SARS CoV-2 vaccin\$ or Pfizer-Bio-N-tech or Pfizer or Moderna or AstraZeneca or Covishield or Covaxin or Sputnik V or Sinovac or Sinopharm or Corona Vac or "Corona virus disease-19 vaccine").mp. 102617
- 39 ((coronavirus\$ or 2019nCoV\$ or 19nCoV\$ or "2019 novel\$" or Ncov\$ or "n-cov" or "SARS-CoV-2\$" or "SARSCoV-2\$" or SARSCoV2\$ or "SARS-CoV2\$" or "severe acute respiratory syndrome\$" or COVID\$2) adj3 vaccin\$).mp. 49387
- 40 or/36-39 119683
- 41 35 and 40 4194
- 42 (new-onset or new presentation or newly presenting or newly presented or new diagnosis or newly diagnosed or newly developed or "linked with" or "linked to" or associated or post or following or after or "connected to" or "connected with").mp. 15220564
- 43 41 and 42 2610
- 44 limit 43 to human 2493

|    |                       |         |
|----|-----------------------|---------|
| 45 | exp conference paper/ | 2709759 |
| 46 | conference.pt.        | 5548357 |
| 47 | or/45-46              | 5570726 |
| 48 | 44 not 47             | 1821    |

### A.3 Cochrane

Cochrane Central Register of Controlled Trials (CENTRAL) and Cochrane Database of Systematic Reviews (CDSR) Results per line

Date: 30/05/2023

|     |                                                                                                 |       |
|-----|-------------------------------------------------------------------------------------------------|-------|
| #1  | MeSH descriptor: [Arthritis, Rheumatoid] explode all trees                                      | 7283  |
| #2  | MeSH descriptor: [Axial Spondyloarthritis] explode all trees                                    | 847   |
| #3  | MeSH descriptor: [Spondylitis, Ankylosing] this term only                                       | 823   |
| #4  | MeSH descriptor: [Arthritis, Reactive] this term only                                           | 46    |
| #5  | MeSH descriptor: [Arthritis, Psoriatic] this term only                                          | 633   |
| #6  | MeSH descriptor: [Crystal Arthropathies] explode all trees                                      | 682   |
| #7  | MeSH descriptor: [Gout] explode all trees                                                       | 656   |
| #8  | MeSH descriptor: [Chondrocalcinosis] explode all trees                                          | 26    |
| #9  | MeSH descriptor: [Connective Tissue Diseases] explode all trees                                 | 12087 |
| #10 | MeSH descriptor: [Antiphospholipid Syndrome] this term only                                     | 138   |
| #11 | MeSH descriptor: [Lupus Erythematosus, Systemic] explode all trees                              | 1420  |
| #12 | MeSH descriptor: [Sjogren's Syndrome] this term only                                            | 362   |
| #13 | MeSH descriptor: [Scleroderma, Systemic] explode all trees                                      | 716   |
| #14 | MeSH descriptor: [Myositis] explode all trees                                                   | 316   |
| #15 | MeSH descriptor: [Dermatomyositis] this term only                                               | 138   |
| #16 | MeSH descriptor: [Polymyositis] this term only                                                  | 60    |
| #17 | MeSH descriptor: [Still's Disease, Adult-Onset] this term only                                  | 12    |
| #18 | MeSH descriptor: [Anti-Neutrophil Cytoplasmic Antibody-Associated Vasculitis] explode all trees | 232   |
| #19 | MeSH descriptor: [Granulomatosis with Polyangiitis] this term only                              | 107   |
| #20 | MeSH descriptor: [Microscopic Polyangiitis] explode all trees                                   | 63    |
| #21 | MeSH descriptor: [Polyarteritis Nodosa] this term only                                          | 40    |
| #22 | MeSH descriptor: [Takayasu Arteritis] this term only                                            | 43    |
| #23 | MeSH descriptor: [Giant Cell Arteritis] this term only                                          | 140   |
| #24 | MeSH descriptor: [Polymyalgia Rheumatica] this term only                                        | 105   |
| #25 | MeSH descriptor: [Polychondritis, Relapsing] this term only                                     | 1     |
| #26 | MeSH descriptor: [Sarcoidosis] explode all trees                                                | 306   |
| #27 | MeSH descriptor: [Behcet Syndrome] this term only                                               | 150   |

- #28 MeSH descriptor: [IgA Vasculitis] this term only 46
- #29 MeSH descriptor: [Cryoglobulinemia] this term only 41
- #30 MeSH descriptor: [Cogan Syndrome] this term only 8
- #31 MeSH descriptor: [Immunoglobulin G4-Related Disease] this term only 13
- #32 "rheumatic immune mediated inflammatory diseases" or R-IMID or R-IMIDs or "Inflammatory arthritis" or "rheumatoid arthritis" or "Axial Spondyloarthritis" or "ankylosing spondylitis" or "reactive arthritis" or "psoriatic arthritis" or "crystal arthritis" or gout or pseudogout or chondrocalcinosis or "remitting seronegative symmetrical synovitis with pitting oedema" or "remitting seronegative symmetrical synovitis with pitting edema" or "connective tissue" NEXT disease\* or CTD26811
- #33 "anti-phospholipid syndrome" or "systemic lupus erythematosus" or SLE or lupus or "systemic sclerosis" or scleroderma or "inflammatory myopathy" or myositis or dermatomyositis or polymyositis or "necrotizing autoimmune myopathy" or "anti-synthetase syndrome" or "adult-onset stills disease" or "Anti-Neutrophil Cytoplasmic Antibody Associated Vasculitis" or "ANCA associated vasculitis" 7731
- #34 "Granulomatosis with polyangiitis" or "Eosinophilic granulomatosis with polyangiitis" or "microscopic polyangiitis" or "Polyarteritis Nodosa" or "large vessel vasculitis" or Takayasu\* NEXT arteritis or "Giant Cell Arteritis" or "medium vessel vasculitis" or "small vessel vasculitis" or "polymyalgia rheumatica" or "relapsing polychondritis" or sarcoidosis or Bechet\* NEXT disease or Behcet\* NEXT syndrome or "IgA Vasculitis" or "Henoch-Schoenlein purpura" or Cryoglobulinemia\* or cogan NEXT syndrome or "Immunoglobulin G4-Related Disease" or "IgG4 disease" 2167
- #35 {or #1-#34} 38485
- #36 MeSH descriptor: [COVID-19 Vaccines] explode all trees 409
- #37 "chadox1 ncov-19" or ad26covs1 or "2019-ncov vaccine mrna-1273" or "bnt162 vaccine" 90
- #38 "SARS CoV-2" NEXT vaccin\* or Pfizer-Bio-N-tech or Pfizer or Moderna or AstraZeneca or Covishield or Covaxin or Sputnik V or Sinovac or Sinopharm or "Corona Vac" or "Corona virus disease-19 vaccine" 7733
- #39 (coronavirus\* or 2019nCoV\* or 19nCoV\* or Ncov\* or n-cov or SARS-CoV-2 or SARSCoV-2 or SARSCoV2 or SARS-CoV2 or "severe acute respiratory" NEXT syndrome\* or COVID) NEAR/3 vaccin\* 1808
- #40 {or #36-#39} 9169
- #41 #35 and #40 456
- #42 new-onset or new presentation or newly presenting or newly presented or new diagnosis or newly diagnosed or newly developed or "linked with" or "linked to" or associated or post or following or after or "connected to" or "connected with" 1137116
- #43 #41 and #42 in Cochrane Reviews, Cochrane Protocols and Trials 384

#### **A.4 LitCovid**

LitCovid Results

Date: 30/05/2023

("connective tissue disease" OR rheumatic OR arthritis) AND (new-onset OR new presentation OR newly presenting OR newly presented OR new diagnosis OR newly diagnosed OR newly developed OR "linked with" OR "linked to" OR associated OR post OR following OR after OR "connected to" OR "connected with") AND (vaccine OR vaccination)

~510

#### **A.5 Google Scholar**

Google Scholar Results

Date: 30/05/2023

("new onset" OR newly) AND ("connective tissue diseases" OR rheumatic OR arthritis) AND (associated OR post OR following OR after) AND (covid OR SARS) AND vaccination -medline -embase

Limited to 2019 onwards

~14,100

#### **A.6 Manual search**

Date: 09/06/2023
